# Supplementary material for: Approaching the ideal elastic limit of metallic glasses
Source: PubMed Central journal article supplement — Nat Commun. 2012 Jan 3;3:609–. doi: 10.1038/ncomms1619 (PMC3272572; doi:10.1038/ncomms1619), 2012-01-03
Supplement: ncomms1619-s1.pdf [file ncomms1619-s1.pdf]

## Supplementary Figures

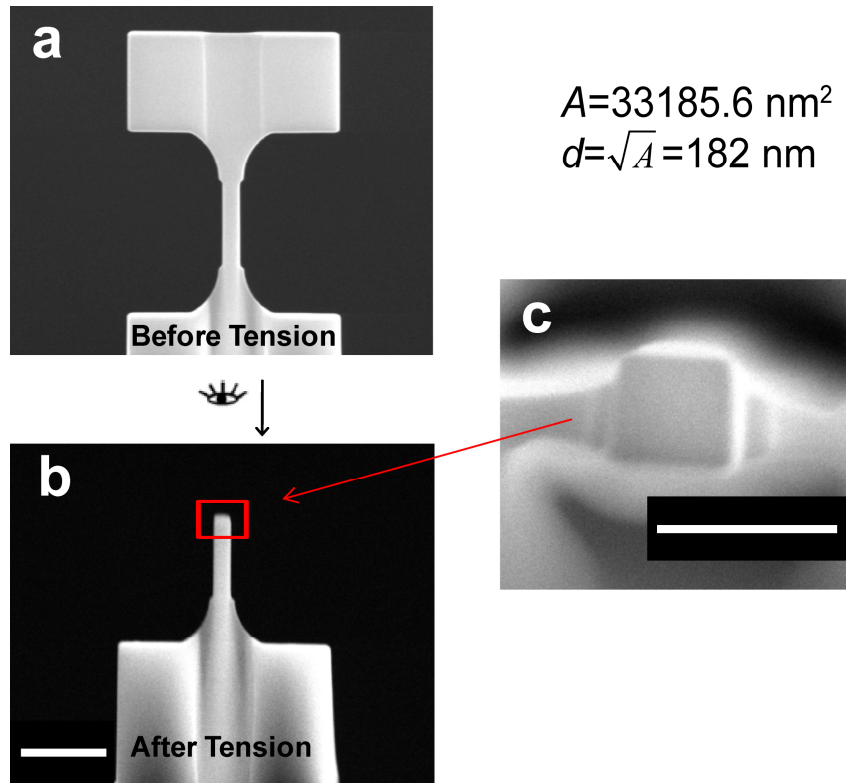

**Supplementary Figure S1. Determination of the cross-section area of tensile samples.** (a) SEM image of the original tensile sample. (b) SEM image after the sample was fractured. (c) Cross-sectional view of the gauge part. The effective sample diameter  $d$  is taken to be  $\sqrt{A}$ . The magnification of the images in (a) and (b) is the same and scale bars in (b) and (c) represent  $1 \mu\text{m}$  and  $200 \text{ nm}$ , respectively.

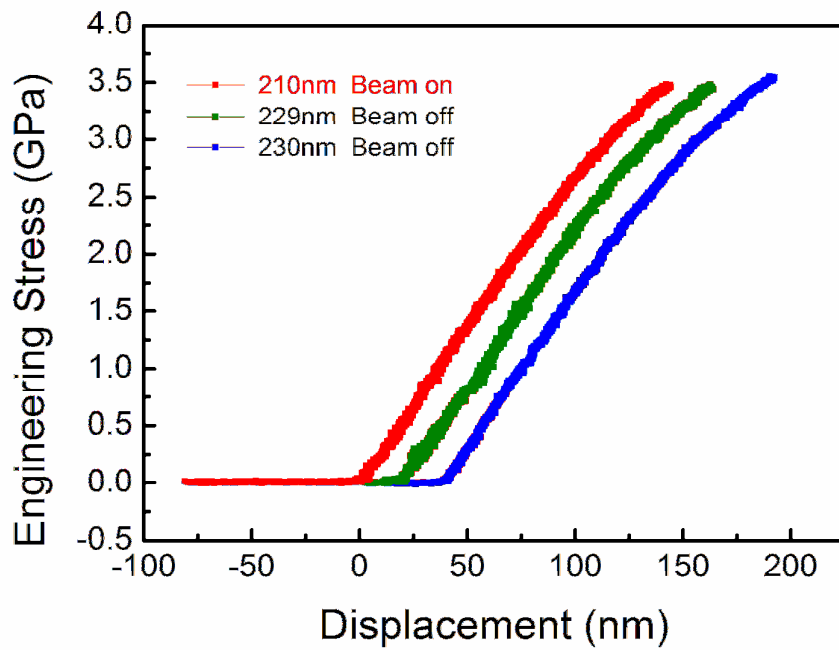

**Supplementary Figure S2. Comparison of tensile test curves between beam-off and beam-on conditions.** The three samples are of the same size except for the minor difference of the thickness (along electron beam direction). The engineering stress vs. displacement curves are almost identical. Apparently the electron beam made no obvious difference.
